# Supplementary material for: Highly reversible lithium storage in Si (core)–hollow carbon nanofibers (sheath) nanocomposites
Source: Royal Society of Chemistry journal article supplement (doi:10.1039/c3nr00322a), 2013-01-01
Supplement: c3nr00322a.pdf [file c3nr00322a.pdf]

## Supporting Information

### Highly Reversible Lithium Storage in Si (core)-Hollow Carbon Nanofibers (sheath) Nanocomposites

*Yan Yu<sup>\*</sup>, Jiaqing Wang, Lin Gu<sup>\*</sup>, Chunlei Wang, Kun Tang, Joachim Maier*

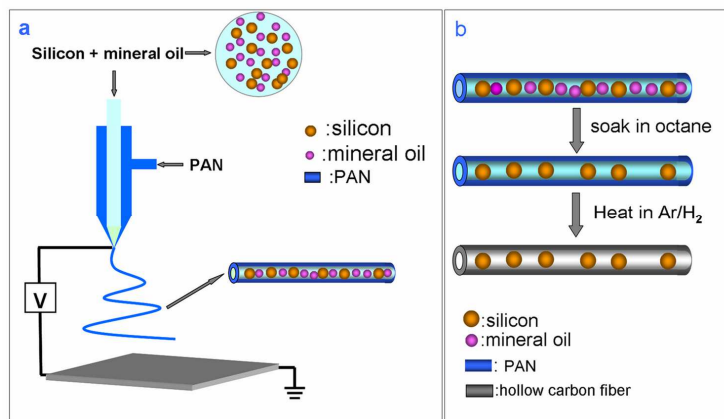

Fig.S1 a) Schematic illustration for design of a coaxial electrospinning spinneret used for preparing PAN/TBT core-sheath nanofibers. SEM micrographs of porous as-collected PAN/TBT nanofibers obtained via coaxial electrospinning.

[\*] Prof. Dr. Y. Yu, Jiaqing Wang, Department of Materials Science and Engineering, University of Science and Technology of China, No.96, JinZhai Road, Hefei, Anhui, 230026, P.R.China.; E-mail : [yanyumse@ustc.edu.cn](mailto:yanyumse@ustc.edu.cn)

Prof. Dr. L. Gu, Beijing Laboratory for Electron Microscopy The Institute of Physics; Chinese Academy of Sciences  
P.O. Box 603, Zhongguancun, Beijing 100190, E-mail : [l.gu@iphy.ac.cn](mailto:l.gu@iphy.ac.cn)

Prof. C. Wang, A. Dhanabalan, Department of Mechanical and Materials Engineering, Florida International University, Miami FL 33174 (USA);

Prof. Dr. J. Maier, Dr. K. Tang, Max Planck Institute for Solid State Research, Heisenbergstrasse 1, 70569 Stuttgart (Germany);

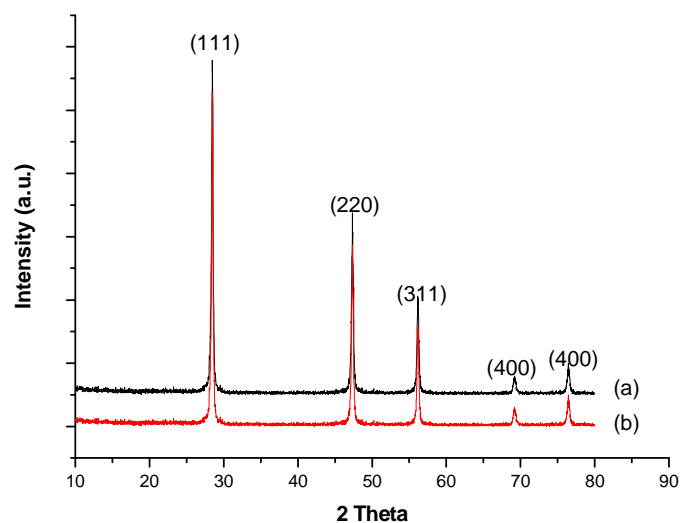

Fig. S2 X-ray diffraction patterns of a) Si nanoparticles; b) Si-hollow carbon nanofibers heated at 800°C in Ar/H<sub>2</sub>. The diffraction peaks from silicon (JCPDS 00-027-1402) are indexed in the patterns.

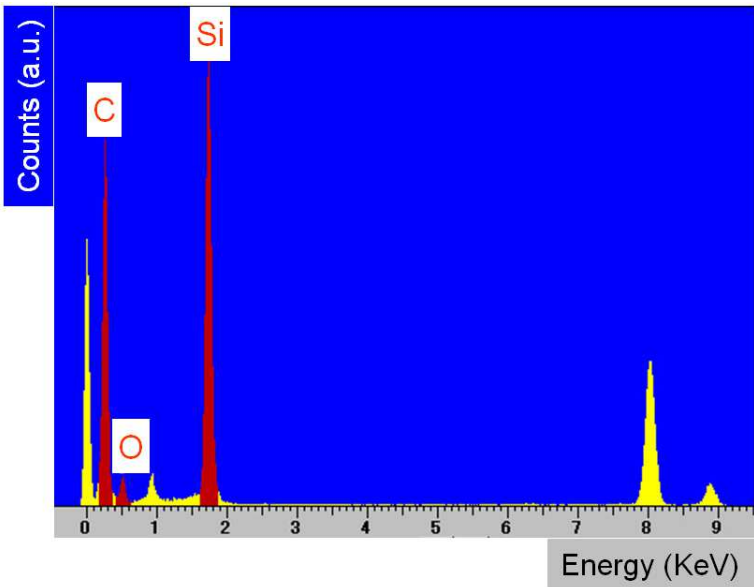

Fig. S3 An EDX spectrum of Si- hollow carbon nanofibers. The spectrum was acquired using a JEOL 2010F microscope operated in image mode. The sample was dispersed on a bare copper substrate to quantify the Si and C concentration. Detailed composition results are shown in Tab. S1.

Table S1: Detailed chemical composition analyses of Sn@carbon nanoparticles in hollow carbon nanofibers.

| Elements | Wt.% | Uncertainty (wt.%) |
|----------|------|--------------------|
| C        | 62.3 | 3.1                |
| O        | 3.0  | 0.2                |
| Si       | 34.7 | 1.7                |
